# Supplementary material for: Synthesis and Properties of α-Mangostin and Vadimezan Conjugates with Glucoheptoamidated and Biotinylated 3rd Generation Poly(amidoamine) Dendrimer, and Conjugation Effect on Their Anticancer and Anti-Nematode Activities
Source: MDPI journal article supplement (doi:10.3390/pharmaceutics14030606), 2022-03-10
Supplement: s1 [file s1]

# Supplementary materials: Synthesis and Properties of $\alpha$ -Mangostin and Vadimezan Conjugates with Glucoheptoamidated and Biotinylated 3rd Generation Poly(amidoamine) Dendrimer, and Conjugation Effect on Their Anticancer and Anti-Nematode Activities

Joanna Markowicz, Stanisław Wołowicz, Wojciech Rode and Łukasz Uram

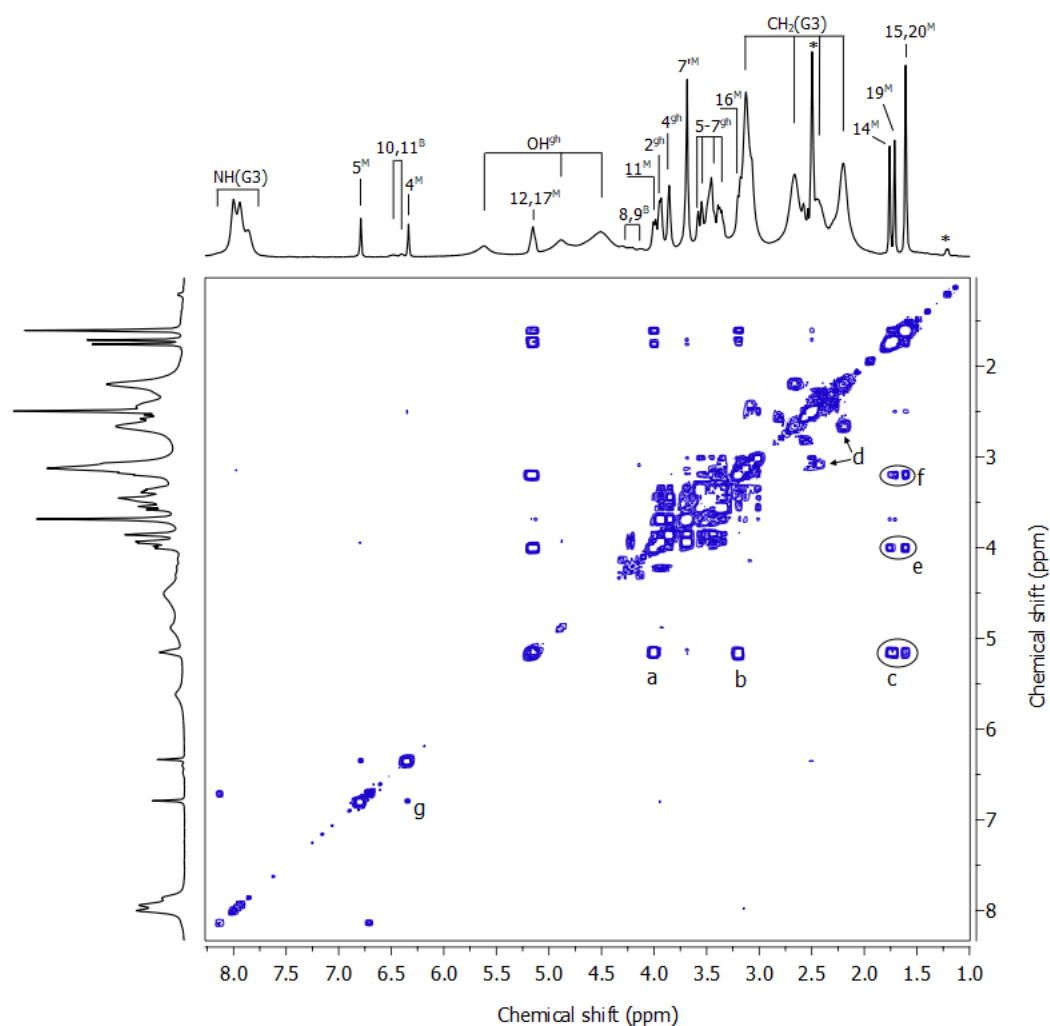

**Figure S1.** The  $^1\text{H}$ - $^1\text{H}$  COSY spectrum of  $\text{G3}^{\text{gh2B5M}}$  in  $\text{DMSO-d}_6$ . The relevant cross-peaks are labeled as follows: a –  $11\text{H}^{\text{M}}/12\text{H}^{\text{M}}$ ; b –  $16\text{H}^{\text{M}}/17\text{H}^{\text{M}}$ ; c – a group of scalar coupling peaks between  $14\text{H}^{\text{M}}$ ,  $15\text{H}^{\text{M}}$ ,  $19\text{H}^{\text{M}}$ ,  $20\text{H}^{\text{M}}$  (methyl group singlets) and  $12\text{H}^{\text{M}}$ ,  $17\text{H}^{\text{M}}$  (overlapping methylene triplets); d – a group of internal PAMAM G3 cross-peaks; e –  $14\text{H}^{\text{M}}, 15\text{H}^{\text{M}}/11\text{H}^{\text{M}}$ ; f –  $19\text{H}^{\text{M}}, 20\text{H}^{\text{M}}/16\text{H}^{\text{M}}$ ; g –  $4\text{H}^{\text{M}}/5\text{H}^{\text{M}}$ . The chemical shifts of  $^1\text{H}$  peaks are collected in Table S1.

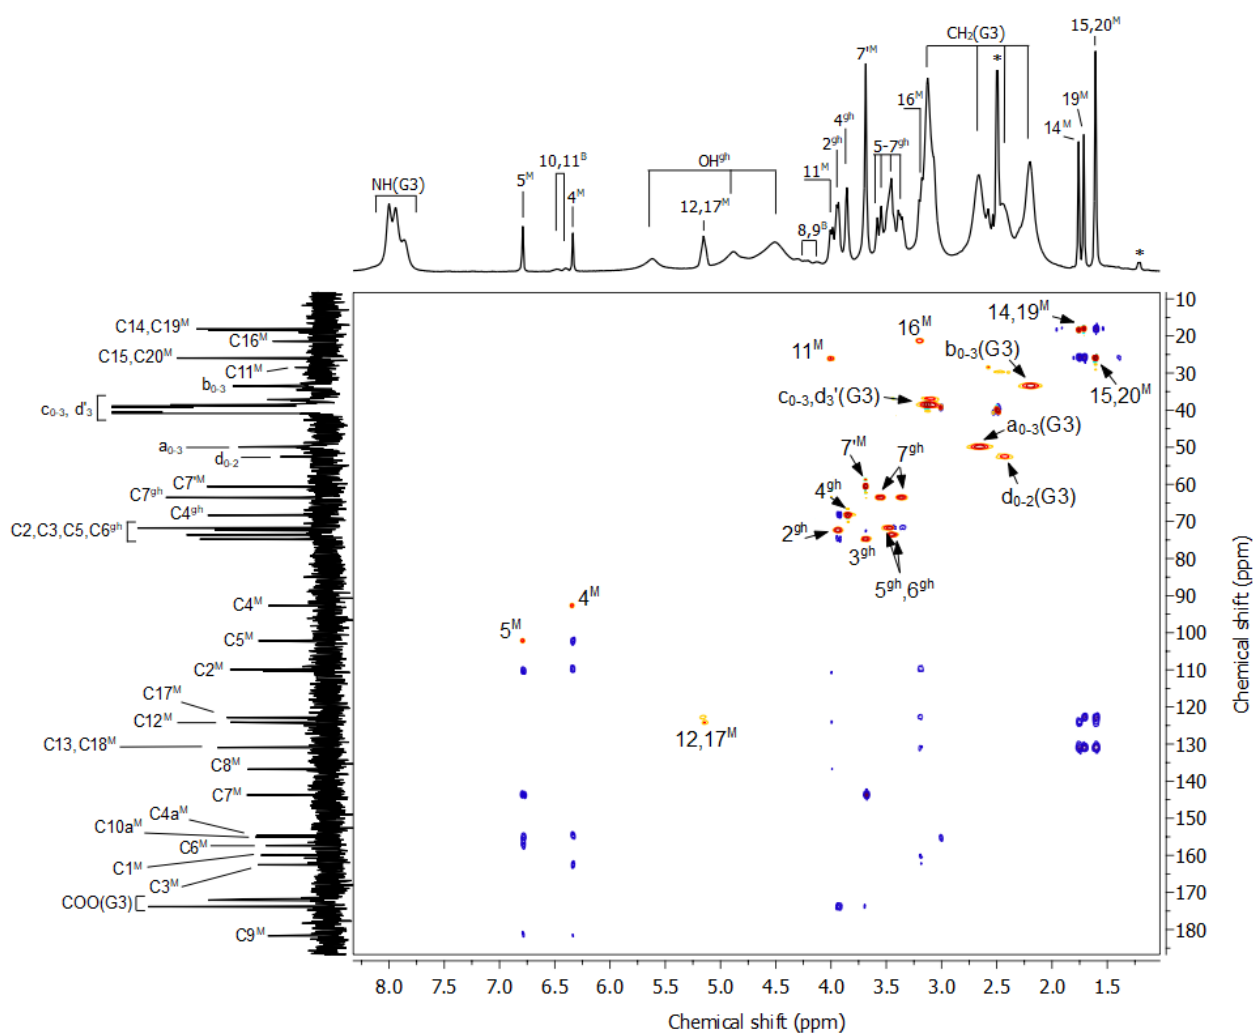

**Figure S2.** The HSQC/HMBC combined spectra for **G3<sup>gh2B5M</sup>** in DMSO- $d_6$ . HSQC peaks are marked yellow-red and HMBC peaks are marked blue. The one-bond  $^1\text{H}$ - $^{13}\text{C}$  peaks are labeled with locant and substituents with upper case (<sup>M</sup>, <sup>B</sup>, and <sup>gh</sup>), while the peaks within PAMAM G3 arms are labeled according to numbering shown in Fig.2 in [29]. The chemical shifts of  $^1\text{H}$  and  $^{13}\text{C}$  peaks are collected in Table S1.

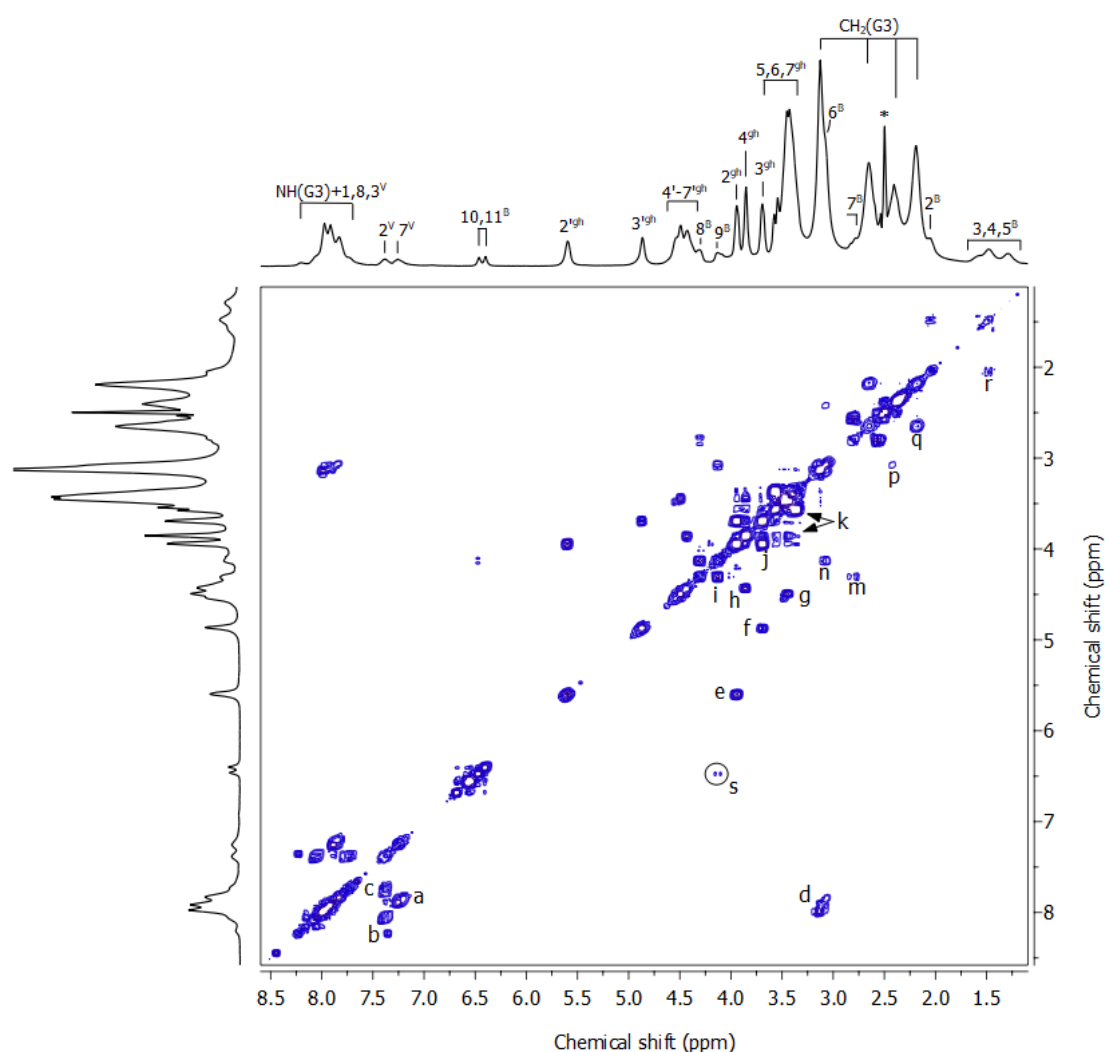

**Figure S3.** The  $^1\text{H}$ - $^1\text{H}$  COSY spectrum of  $\text{G3}_{\text{gh4B5V}}$  in  $\text{DMSO-d}_6$ . The relevant cross-peaks are labeled as follows: a –  $7\text{H}^{\text{V}}/8\text{H}^{\text{V}}$ ; b –  $2\text{H}^{\text{V}}/1\text{H}^{\text{V}}$ ; c –  $2\text{H}^{\text{V}}/3\text{H}^{\text{V}}$ ; d –  $\text{c0-3}/\text{NH}$  (internal PAMAM G3 cross-peak; for detailed assignment see Fig. 2 in [29]); e –  $2\text{H}^{\text{gh}}/2'\text{H}^{\text{gh}}$ ; f –  $3\text{H}^{\text{gh}}/3'\text{H}^{\text{gh}}$ ; g – cross-peak between group of gh CH protons ( $5^{\text{gh}}$ ,  $6^{\text{gh}}$ ,  $7^{\text{gh}}$ ) and group of OH protons ( $5'^{\text{gh}}$ ,  $6'^{\text{gh}}$ ,  $7'^{\text{gh}}$ ) in gh; h –  $4\text{H}^{\text{gh}}/4'\text{H}^{\text{gh}}$ ; i –  $9\text{H}^{\text{B}}/8\text{H}^{\text{B}}$ ; j –  $3\text{H}^{\text{gh}}/2\text{H}^{\text{gh}}, 4\text{H}^{\text{gh}}$ ; k –  $5\text{H}^{\text{gh}}/4\text{H}^{\text{gh}}$ ; m –  $7\text{H}^{\text{B}}/8\text{H}^{\text{B}}$ ; n –  $6\text{H}^{\text{B}}/9\text{H}^{\text{B}}$ ; p –  $\text{d0-2}/\text{c0-3}$  and q –  $\text{b0-3}/\text{a0-3}$  (internal PAMAM G3 cross-peaks); r –  $3\text{H}^{\text{B}}/2\text{H}^{\text{B}}$ ; s –  $9\text{H}^{\text{B}}/11\text{H}^{\text{B}}$ . The chemical shifts of  $^1\text{H}$  peaks are collected in Table S1.

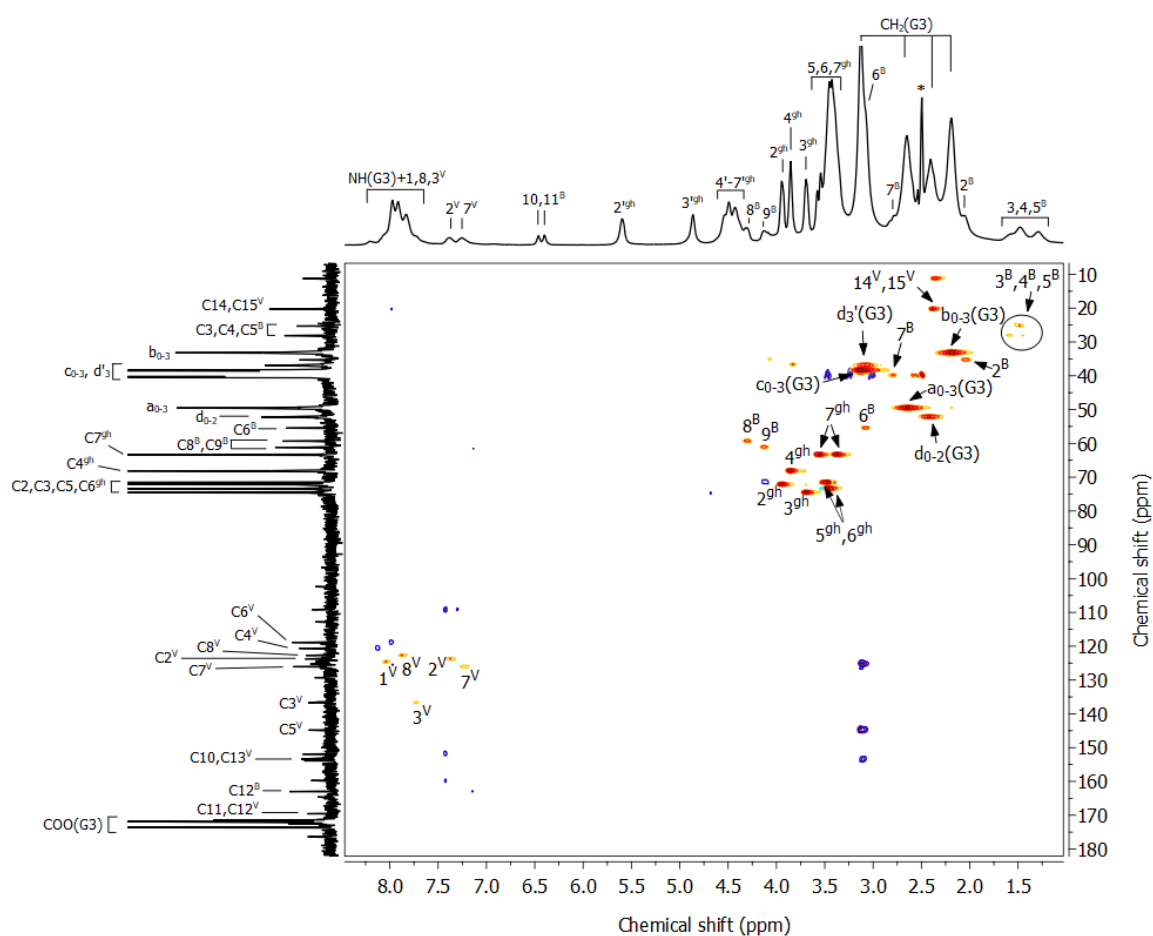

**Figure S4.** The HSQC/HMBC combined spectra for **G3gh4B5V** in DMSO- $d_6$ . HSQC peaks are marked yellow-red and HMBC peaks are marked blue. The one-bond  $^1\text{H}$ - $^{13}\text{C}$  peaks are labeled with locant and substituents with upper case ( $^V$ ,  $^B$ , and  $^{gh}$ ), while the peaks within PAMAM G3 arms are labeled according to numbering shown in Fig.2 in [29]. The group of HSQC peaks between 3, 4, and 5 proton nuclei of biotin and corresponding carbon nuclei are grouped within the circle on the map. The chemical shifts of  $^1\text{H}$  and  $^{13}\text{C}$  peaks are collected in Table S1.

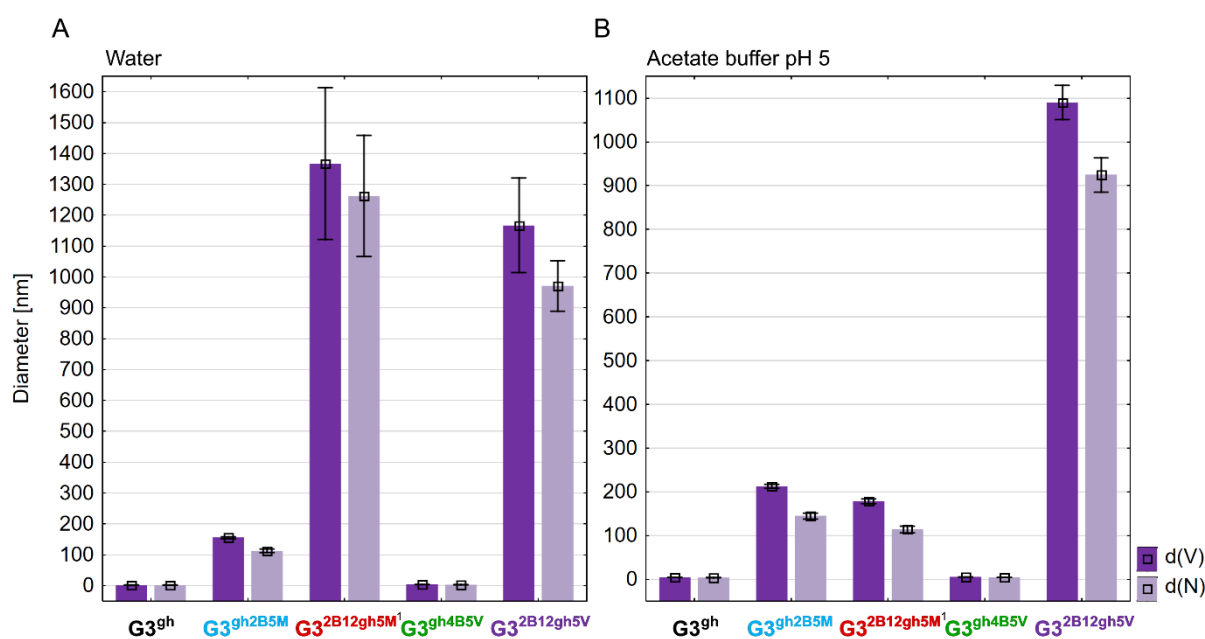

**Figure S5.** Diameter of conjugates averaged by volume (d(V)) and by number of molecules (d(N)) measured in water (A) and in acetate buffer pH 5 (B). Data are presented as a mean  $\pm$  standard deviation. <sup>1</sup> Values for G3<sup>2B12gh</sup>5M were reproduced from [29].

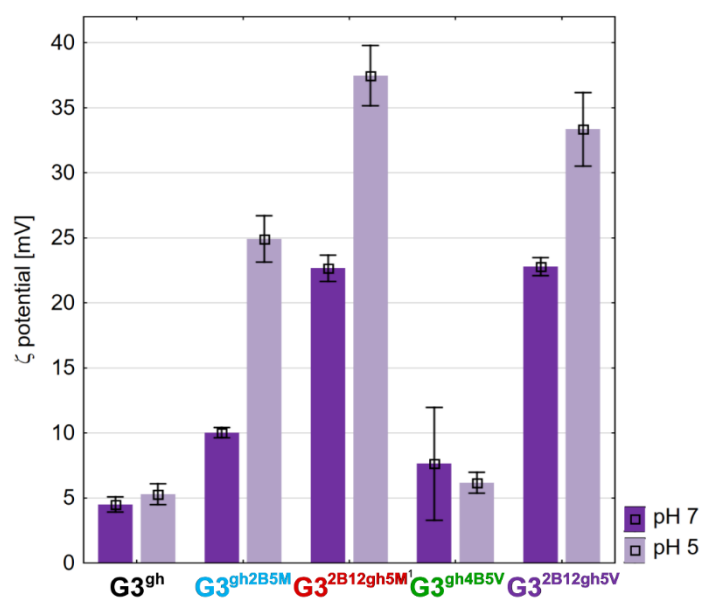

**Figure S6.** Zeta potential of conjugates measured in water (pH 7) and acetate buffer (pH 5). Data are presented as a mean  $\pm$  standard deviation. <sup>1</sup> Values for G3<sup>2B12gh</sup>5M were taken from [29].

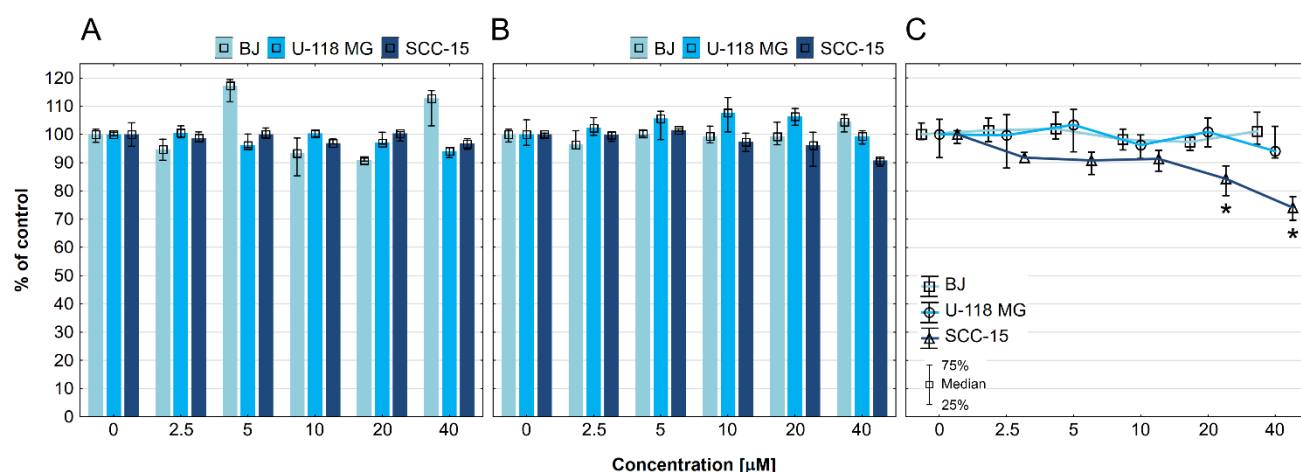

**Figure S7.** Cytotoxicity of  $G3^{gh}$  vehicle estimated with NR (A) and XTT (B) assay after 48 h incubation with normal fibroblasts (BJ), glioblastoma cells (U-118 MG) and squamous carcinoma cells (SCC-15). Anti-proliferative activity (C) of  $G3^{gh}$  against BJ, U-118 MG, and SCC-15 cells after 72 h of incubation, determined with Hoechst 33342 staining. Results are presented as medians of a percent against non-treated control (control expressed as 100%). The whiskers indicate lower (25%) and upper (75%) quartile ranges. \*  $p \leq 0.05$ ; Kruskal-Wallis test (against non-treated control).

**Table S1.** The  $^1H$  and  $^{13}C$  resonance assignments of the  $G3^{gh4B5V}$ , V,  $G3^{gh2B5M}$  and  $\alpha M$  based on COSY and HSQC/HMBC spectra in DMSO- $d_6$ . The superscripts:  $B$ ,  $gh$ ,  $V$  and  $M$  are related to Biotin, glucoheptamide, Vadimezan and  $\alpha$ -Mangostin, respectively. The annotation nd means not determined due to low intensity of resonances or overlapping with high intensity peaks from PAMAM.

| Species<br>Locant                                                         | $G3^{gh4B5V}$ |          | Vadimezan |          | $G3^{gh2B5M}$ |          | $\alpha$ -Mangostin |          |
|---------------------------------------------------------------------------|---------------|----------|-----------|----------|---------------|----------|---------------------|----------|
|                                                                           | $^1H$         | $^{13}C$ | $^1H$     | $^{13}C$ | $^1H$         | $^{13}C$ | $^1H$               | $^{13}C$ |
| b0-3(PAMAM)                                                               | 2.19          | 33.2     |           |          | 2.20          | 33.5     |                     |          |
| d0-2(PAMAM)                                                               | 2.42          | 52.2     |           |          | 2.45          | 52.6     |                     |          |
| a0-3(PAMAM)                                                               | 2.65          | 49.5     |           |          | 2.66          | 49.9     |                     |          |
| d3'(PAMAM)                                                                | 3.08          | 37.0     |           |          | 3.07          | 37.2     |                     |          |
| c0-3(PAMAM)                                                               | 3.13          | 38.3     |           |          | 3.13          | 38.6     |                     |          |
| -COO(G3)                                                                  | -             | 171.5    |           |          | -             | 171.9    |                     |          |
| -COO(G3)                                                                  | -             | 171.8    |           |          | -             | 173.8    |                     |          |
| NH(G3)                                                                    | 7.98          |          |           |          | 7.93          |          |                     |          |
| 2 <sup>B</sup>                                                            | 2.05          | 35.3     |           |          | nd            | nd       |                     |          |
| 3 <sup>B</sup> , 4 <sup>B</sup> , 5 <sup>B</sup>                          | 1.20-1.65     | 25.3     |           |          | 1.21          | nd       |                     |          |
| 3 <sup>B</sup> , 4 <sup>B</sup> , 5 <sup>B</sup>                          | 1.20-1.65     | 28.1     |           |          |               |          |                     |          |
| 3 <sup>B</sup> , 4 <sup>B</sup> , 5 <sup>B</sup>                          | 1.20-1.65     | 28.3     |           |          |               |          |                     |          |
| 6 <sup>B</sup>                                                            | 3.08          | 55.5     |           |          | nd            |          |                     |          |
| 7 <sup>B</sup>                                                            | 2.78          | nd       |           |          | nd            |          |                     |          |
| 8 <sup>B</sup>                                                            | 4.31          | 59.4     |           |          | 4.30          | nd       |                     |          |
| 9 <sup>B</sup>                                                            | 4.13          | 61.2     |           |          | 4.12          | nd       |                     |          |
| 10 <sup>B</sup>                                                           | 6.40          | nd       |           |          | 6.40          | nd       |                     |          |
| 11 <sup>B</sup>                                                           | 6.46          | nd       |           |          | 6.48          | nd       |                     |          |
| 12 <sup>B</sup>                                                           | -             | 163.0    |           |          | -             | nd       |                     |          |
| 1 <sup>gh</sup>                                                           | -             | 172.5    |           |          | -             | nd       |                     |          |
| 2 <sup>gh</sup>                                                           | 3.94          | 72.2     |           |          | 3.94          | 72.4     |                     |          |
| 3 <sup>gh</sup>                                                           | 3.69          | 74.6     |           |          | 3.69          | 74.8     |                     |          |
| 4 <sup>gh</sup>                                                           | 3.85          | 68.1     |           |          | 3.86          | 68.3     |                     |          |
| 5 <sup>gh</sup> or 6 <sup>gh</sup>                                        | 3.46          | 73.4     |           |          | 3.45          | 73.7     |                     |          |
| 5 <sup>gh</sup> or 6 <sup>gh</sup>                                        | 3.48          | 71.6     |           |          | 3.48          | 71.8     |                     |          |
| 7 <sup>gh</sup>                                                           | 3.60-3.30     | 63.3     |           |          | 3.60-3.30     | 63.5     |                     |          |
| 4' <sup>gh</sup> , 5' <sup>gh</sup> , 6' <sup>gh</sup> , 7' <sup>gh</sup> | 4.54-4.43     | -        |           |          | 5.62-4.51     | -        |                     |          |

|                                    |      |       |       |                |
|------------------------------------|------|-------|-------|----------------|
|                                    |      |       |       |                |
| 3' <sup>gh</sup>                   | 4.86 | -     |       | -              |
| 2' <sup>gh</sup>                   | 5.60 | -     |       | -              |
| 1 <sup>v</sup>                     | 7.98 | 124.5 | 8.09  | 124.6          |
| 2 <sup>v</sup>                     | 7.38 | 123.7 | 7.41  | 123.8          |
| 3 <sup>v</sup>                     | 7.73 | 136.7 | 7.79  | 136.7          |
| 4 <sup>v</sup>                     | -    | 120.6 | -     | 120.6          |
| 5 <sup>v</sup>                     | -    | 144.8 | -     | 144.8          |
| 6 <sup>v</sup>                     | -    | 118.9 | -     | 118.9          |
| 7 <sup>v</sup>                     | 7.26 | 126.1 | 7.30  | 126.1          |
| 8 <sup>v</sup>                     | 7.88 | 122.7 | 7.92  | 122.7          |
| 9 <sup>v</sup>                     | -    | 176.5 | -     | 176.3          |
| 10 <sup>v</sup>                    | -    | 153.9 | -     | 154.0          |
| 11 <sup>v</sup> or 12 <sup>v</sup> | -    | 169.6 | -     | 169.3          |
| 13 <sup>v</sup>                    | -    | 153.4 | -     | 153.5          |
| 14 <sup>v</sup> , 15 <sup>v</sup>  | 2.37 | 20.3  | 2.41  | 11.15<br>20.25 |
| 16 <sup>v</sup>                    | nd   | nd    | 3.98  | 35.7           |
| 17 <sup>v</sup>                    | -    | 173.6 | -     | 172.0          |
| 1 <sup>M</sup>                     |      |       | -     | 159.9          |
| 1' <sup>M</sup>                    |      |       | 13.73 | -              |
| 2 <sup>M</sup>                     |      |       | -     | 109.8          |
| 3 <sup>M</sup>                     |      |       | -     | 162.6          |
| 3' <sup>M</sup>                    |      |       | -     | -              |
| 4 <sup>M</sup>                     |      |       | 6.34  | 92.7           |
| 4a <sup>M</sup>                    |      |       | -     | 154.5          |
| 9a <sup>M</sup>                    |      |       | -     | nd             |
| 9 <sup>M</sup>                     |      |       | -     | 181.7          |
| 8a <sup>M</sup>                    |      |       | -     | nd             |
| 10a <sup>M</sup>                   |      |       | -     | 155.1          |
| 5 <sup>M</sup>                     |      |       | 6.79  | 102.1          |
| 6 <sup>M</sup>                     |      |       | -     | 157.3          |
| 6' <sup>M</sup>                    |      |       | -     | -              |
| 7 <sup>M</sup>                     |      |       | -     | 143.7          |
| 7' <sup>M</sup>                    |      |       | 3.69  | 60.5           |
| 8 <sup>M</sup>                     |      |       | -     | 136.7          |
| 11 <sup>M</sup>                    |      |       | 3.99  | 26.0           |
| 12 <sup>M</sup>                    |      |       | 5.15  | 124.1          |
| 13 <sup>M</sup>                    |      |       | -     | 130.8          |
| 14 <sup>M</sup>                    |      |       | 1.76  | 18.6           |
| 15 <sup>M</sup>                    |      |       | 1.61  | 26.1           |
| 16 <sup>M</sup>                    |      |       | 3.19  | 21.4           |
| 17 <sup>M</sup>                    |      |       | 5.15  | 122.8          |
| 18 <sup>M</sup>                    |      |       | -     | 130.9          |
| 19 <sup>M</sup>                    |      |       | 1.71  | 18.1           |
| 20 <sup>M</sup>                    |      |       | 1.61  | 26.0           |
